# Supplementary material for: Systematic review of birth cohort studies in South East Asia and Eastern Mediterranean regions
Source: PubMed Central journal article supplement (PMC3484744), 2011-06
Supplement: jogh-01-059-s001.pdf [file jogh-01-059-s001.pdf]

**Supplementary Table 1.** Summary of all studies (n=120) in South East Asia (SEA) and Eastern Mediterranean (EM) regions

| Author        | Publication Year | Country    | Measurements / Samples                                                                                                               |                         |                                                     | No. Subjects | Start Age (months) | Duration (months) |
|---------------|------------------|------------|--------------------------------------------------------------------------------------------------------------------------------------|-------------------------|-----------------------------------------------------|--------------|--------------------|-------------------|
|               |                  |            | Biological                                                                                                                           | Anthropometric          | Socioeconomic                                       |              |                    |                   |
| Agnihotri, B  | 2008             | India      |                                                                                                                                      |                         |                                                     | 1525         |                    |                   |
| Ahmed, N      | 1993             | Bangladesh |                                                                                                                                      |                         | cleanliness score                                   | 7            |                    |                   |
| Akram, D      | 1991             | Pakistan   |                                                                                                                                      | W, H (compared to NCHS) | all high SES                                        | 1100         |                    |                   |
| Akram, D      | 2000             | Pakistan   |                                                                                                                                      |                         |                                                     |              |                    |                   |
| Alam, D       | 2000             | Bangladesh |                                                                                                                                      | W, H                    |                                                     | 584          | 6-48               | 12                |
| Alam, N       | 1995             | Bangladesh |                                                                                                                                      |                         | household economic status                           | 3729         | 0                  | 36                |
| Alam, N       | 1998             | Bangladesh |                                                                                                                                      |                         | household possession valuable items                 |              | 0                  |                   |
| Alam, N       | 2001             | Bangladesh |                                                                                                                                      |                         | household economic status                           | 2696         | 0                  |                   |
| Amin, S.      | 1990             | India      |                                                                                                                                      |                         | maternal education, SES, health service utilization |              |                    |                   |
| Amin-Zaki, L  | 1981             | Iraq       | maternal blood mercury, breast-milk mercury                                                                                          |                         | breastfed/non, forcefed                             |              |                    | 60                |
| Arifeen, S    | 2001             | Bangladesh |                                                                                                                                      | BW                      |                                                     | 1677         | 0                  | 12                |
| Ashraf, R     | 1993             | Pakistan   |                                                                                                                                      |                         | breastfeeding initiation duration, SES              | 1476         | 0                  | 24                |
| Avsm, Y       | 1995             | India      |                                                                                                                                      |                         |                                                     |              |                    |                   |
| Ayatollahi, S | 2001             | Iran       |                                                                                                                                      | W, H                    |                                                     | 317          | 0                  |                   |
| Badari, S     | 1991             | India      |                                                                                                                                      |                         | cultivable land, maternal/paternal education        | 1920         | -3-0               | 12                |
| Banerjee, I   | 2006             | India      | routine samples and samples from both child and contacts if any show diarrhoeal symptoms, VP6 antigen, phylogenetic (G and P typing) |                         |                                                     | 351          | range              |                   |

|               |      |            |                                                                                                   |                                          |                                                                                                                  |         |         |    |
|---------------|------|------------|---------------------------------------------------------------------------------------------------|------------------------------------------|------------------------------------------------------------------------------------------------------------------|---------|---------|----|
|               |      |            | analysis to test for transmission                                                                 |                                          |                                                                                                                  |         |         |    |
| Bassily, S    | 2004 | India      | maternal and child serum tested for H. Pylori IgG                                                 |                                          | questionnaire at enrolment: maternal age, education, SES, number pregnancies, children, planned feeding practice | 169     | 7-9, 18 | 18 |
| Baqui, A.     | 1993 | Bangladesh | multiple antigen skin test - baseline and every 3mo                                               | W and H monthly                          | Y                                                                                                                | 705     | <60     | 12 |
| Bavdekar, A   | 1994 | India      |                                                                                                   | W, H, head circumference, expressed as Z |                                                                                                                  | 164+247 | 0       | 48 |
| Bhalla, A. K. | 1999 | India      |                                                                                                   | mid-upper arm circumference              |                                                                                                                  | 154     | 1       | 12 |
| Bhan, M       | 1989 | India      | Aeromonas, Campylobacter jejuni, E. coli                                                          |                                          |                                                                                                                  | 452     |         | 13 |
| Bhandari, N   | 2002 | India      |                                                                                                   |                                          |                                                                                                                  | 162     |         |    |
| Bhardwaj, N   | 1995 | India      |                                                                                                   |                                          |                                                                                                                  | 212     | <0      | 12 |
| Bhuiyan, T    | 2009 | Bangladesh | serum IgA, serum IgG, stool antigen, ABO blood group, other enteropathogens                       | malnutrition                             |                                                                                                                  | 238     |         | 24 |
| Bhutta, Z     | 1997 | Pakistan   | blood culture: Staphylococcus aureus (18%), group B Streptococci (13%), and Klebsiella pneumoniae |                                          |                                                                                                                  | 6784    | 0       |    |
| Bishai, D     | 2003 | Bangladesh |                                                                                                   |                                          | maternal schooling, land holdings, dwelling size, number of rooms                                                | 16270   | 9-60    |    |

|                  |      |            |                                                                                                                                                                                                          |                                  |                                                                                                                              |      |   |     |
|------------------|------|------------|----------------------------------------------------------------------------------------------------------------------------------------------------------------------------------------------------------|----------------------------------|------------------------------------------------------------------------------------------------------------------------------|------|---|-----|
| Black, R         | 1984 | Bangladesh | stool enteropathogens - E.coli, Shigella                                                                                                                                                                 | W (every 2mo), H (every y)       |                                                                                                                              |      |   |     |
| Bosch, AM        | 2008 | Bangladesh |                                                                                                                                                                                                          | H, W                             |                                                                                                                              |      |   | 144 |
| Broor, S         | 2007 | India      | nasopharyngeal aspirates- direct fluorescent antibody testing for respiratory syncytial virus (RSV), influenza, parainfluenza viruses and adenoviruses, and also centrifugation enhanced culture for RSV |                                  |                                                                                                                              | 281  | 0 |     |
| Brush, G         | 2001 | Sudan      |                                                                                                                                                                                                          |                                  | maternal employment                                                                                                          |      |   |     |
| Brush, G         | 1993 | Sudan      |                                                                                                                                                                                                          | W, H                             | maternal income                                                                                                              | 96   | 0 | 12  |
| Cheung, Y        | 2001 | Pakistan   |                                                                                                                                                                                                          | BH, thinness, H/thinness for 6mo |                                                                                                                              |      | 0 |     |
| Chowdhury, A. K. | 1982 | Bangladesh |                                                                                                                                                                                                          | W                                | number of country boats                                                                                                      | 1009 |   | 28  |
| Coles, C         | 2001 | India      | serotypes                                                                                                                                                                                                |                                  | maternal literacy, number cigarettes/day in house, colostrum, gender                                                         | 464  | 0 |     |
| Drewett, R       | 1993 | Thailand   |                                                                                                                                                                                                          |                                  |                                                                                                                              | 60   |   |     |
| Dutt, D          | 1997 | India      |                                                                                                                                                                                                          |                                  | SES                                                                                                                          | 356  | 0 | 60  |
| Fall, CH         | 2008 | India      | glucose, lipids, insulin                                                                                                                                                                                 | H, W, BMI, waist circumference   |                                                                                                                              | 1492 | 0 |     |
| Fikree, F        | 2000 | Pakistan   |                                                                                                                                                                                                          | W, H                             | water and sanitation facilities, availability of electricity, type of house construction material and average monthly income | 738  | 0 |     |
| Fikree, F        | 1999 | Pakistan   |                                                                                                                                                                                                          | W, H compare to NCHS             |                                                                                                                              | 727  | 0 | 24  |

|               |      |            |                                                                        |                                              |                                                                                                     |      |        |     |
|---------------|------|------------|------------------------------------------------------------------------|----------------------------------------------|-----------------------------------------------------------------------------------------------------|------|--------|-----|
| Ghosh, R      | 2006 | Bangladesh |                                                                        |                                              |                                                                                                     | >140 |        | 27  |
| Ghosh, S      | 1976 | India      |                                                                        |                                              | maternal literacy, maternal urban stay                                                              | 802  | >12    |     |
| Ghosh, S      | 2002 | India      |                                                                        | W                                            |                                                                                                     |      |        |     |
| Gladstone, B  | 2007 | India      |                                                                        |                                              | Morbidity (community diagnosis / hospitalization / clinic visit)                                    | 452  | 0      | 19  |
| Granat, SM    | 2007 | Bangladesh | nasopharyngeal samples from children and adults cultured and serotyped |                                              |                                                                                                     |      | 0      | 12  |
| Gubhaju, BB   | 1985 | Nepal      |                                                                        |                                              | birth spacing, sibling mortality                                                                    |      |        |     |
| Hafeman, D    | 2007 | Bangladesh |                                                                        |                                              | Y                                                                                                   | 3837 | 0      | 12  |
| Hagekull, B   | 1993 | Pakistan   |                                                                        |                                              | SES, housing quality, area (urban/peri-urban/village), sanitary conditions, family composition      | 1746 | 0      |     |
| Harrison, GA  | 1994 | Sudan      |                                                                        | W, H                                         |                                                                                                     |      |        |     |
| Harrison, GA. | 1992 | Sudan      |                                                                        | W, H                                         |                                                                                                     | 203  | 0      | 12  |
| Hasan, K      | 2006 | Bangladesh | Stool samples monthly and if diarrhoea                                 |                                              | breastfeeding/nonexclusive/exclusive, number in household, animals, monthly income, water, disposal | 252  | 0      | 24  |
| Hauspie, RC   | 1980 | India      |                                                                        | H, compared to Indian and European standards |                                                                                                     | 563  |        | 168 |
| Hebert, JR    | 1985 | India      |                                                                        | W&W-for-age                                  | food expenditure                                                                                    | 627  |        |     |
| Hirve, SS     | 1994 | India      |                                                                        |                                              | SES; parity, birth interval                                                                         | 1922 | <0     |     |
| Huttly, SR    | 1989 | Bangladesh |                                                                        |                                              |                                                                                                     |      | 0-48   | 46  |
| Ibrahim, MM   | 1994 | Somalia    |                                                                        |                                              | maternal age, occupation, literacy, household size                                                  | 431  |        | 12  |
| Ibrahim, SA   | 2006 | Sudan      | cord blood, heel prick                                                 |                                              |                                                                                                     |      | 0      | 24  |
| Jahari, AB    | 2000 | Indonesia  |                                                                        |                                              |                                                                                                     |      | 12, 18 | 12  |
| Jalil, F      | 1989 | Pakistan   |                                                                        | H, W                                         | family education, housing                                                                           | 910  | 0      | 24  |

|                 |      |            |                                       |                             |                                                                                                                                                                   |           |        |                      |
|-----------------|------|------------|---------------------------------------|-----------------------------|-------------------------------------------------------------------------------------------------------------------------------------------------------------------|-----------|--------|----------------------|
|                 |      |            |                                       |                             | standards                                                                                                                                                         |           |        |                      |
| Jalil, F        | 1993 | Pakistan   |                                       |                             | SES, social structure                                                                                                                                             | 1476      | 0      |                      |
| Jeon, BP        | 1996 | Korea      |                                       |                             | school type, income                                                                                                                                               |           |        |                      |
| Jirapinyo, P    | 2005 | Thailand   |                                       | W, H                        |                                                                                                                                                                   |           |        | 60                   |
| Kabir, M        | 1995 | Bangladesh |                                       |                             |                                                                                                                                                                   |           |        |                      |
| Kabir, Z        | 2002 | India      |                                       |                             |                                                                                                                                                                   |           | 0-59   | 96                   |
| Kabir, Z        | 2003 | India      |                                       |                             | caste, area, family size                                                                                                                                          | 15578     |        |                      |
| Kardjati, S     | 1991 | Indonesia  |                                       | BW, growth (compared NCHS)  | breastfed/non, forcefed                                                                                                                                           | 561       | 0      |                      |
| Karlberg, J     | 1993 | Pakistan   |                                       | H, W, W/L                   | 3 areas: urban, periurban, rural                                                                                                                                  |           | 0      |                      |
| Kelishadi, R    | 2007 | Iran       | cord blood lipid (triglyceride, apoB) | BW, PI                      |                                                                                                                                                                   | 442       | 0      |                      |
| Khalil, K       | 1993 | Pakistan   | stool cultures                        | W, H monthly till 36 months | SES                                                                                                                                                               | 1476      | 0-18   | 60-78                |
| Khin-Maung-U    | 1990 | SEA        |                                       |                             | Breath-hydrogen tests were performed after a rice meal at monthly intervals 6 months on 75 children; anthropometric measurements with growth rates every 3 months |           | 1*, 3* | H, W (compared NCHS) |
| Kim, J          | 2009 | Korea      |                                       |                             | parental education, occupation (birth cert)                                                                                                                       | 1,329,540 | 0      |                      |
| Kim, TH         | 1988 | Korea      |                                       |                             | maternal age, birth order, mother's education, number of rooms                                                                                                    | 5000      |        |                      |
| Kirksey, A      | 1991 | Egypt      |                                       |                             | household SES                                                                                                                                                     |           | >-3    |                      |
| Koenig, MA      | 1990 | Bangladesh |                                       |                             |                                                                                                                                                                   | 16270     |        | 44                   |
| Koenig, MA      | 1990 | Bangladesh |                                       |                             |                                                                                                                                                                   |           |        |                      |
| Kolsteren, PW   | 1997 | Indonesia  |                                       | BW, BH, PI, H, W            |                                                                                                                                                                   |           | 0      |                      |
| Kolsteren, PW   | 1997 | Indonesia  |                                       | W, H                        |                                                                                                                                                                   |           | 0      |                      |
| Kongsomboon, K  | 2004 | Thailand   |                                       |                             |                                                                                                                                                                   |           |        |                      |
| Krishnaswamy, K | 2002 | India      |                                       | BW, adult BMI, BP           |                                                                                                                                                                   | 128       |        |                      |
| Kulsoom, U      | 1997 | Pakistan   |                                       |                             | breastfeeding initiation supplementation prelacteal; baby gender; maternal literacy; SES;                                                                         | 52        |        |                      |

|               |      |            |                                                                |                                                                          |                                                                                                                |      |      |    |
|---------------|------|------------|----------------------------------------------------------------|--------------------------------------------------------------------------|----------------------------------------------------------------------------------------------------------------|------|------|----|
|               |      |            |                                                                |                                                                          | perception milk volume adequacy                                                                                |      |      |    |
| Kusin, JA     | 1991 | Indonesia  |                                                                | W, H                                                                     |                                                                                                                | 391  |      |    |
| Kusin, JA.    | 1992 | Indonesia  |                                                                | W, H                                                                     |                                                                                                                | 542  | 0    |    |
| Kusin, JA     | 1991 | Indonesia  |                                                                | W, H                                                                     |                                                                                                                | 391  | 0    |    |
| Launer, LJ    | 1990 | Indonesia  |                                                                | W                                                                        | breastfeeding time as proportion of household visit (1-4)                                                      | 33   |      |    |
| Lone, FW      | 2004 | Pakistan   | maternal Hb                                                    | BW, IUGR                                                                 |                                                                                                                | 629  |      |    |
| Mahmud, A     | 1993 | Pakistan   |                                                                |                                                                          |                                                                                                                | 1476 | 0    | 24 |
| Mahmud, MA    | 1995 | Egypt      |                                                                |                                                                          | latrine not in house, mud floor in the sleeping rooms, and household exposure >10 chickens, mothers' education |      | 0    | 12 |
| Mathur, R     | 1985 | India      | diarrhoeal aetiology                                           | initial H and W                                                          |                                                                                                                | 721  | <60  | 12 |
| Meguid, NA    | 2004 | Egypt      |                                                                |                                                                          |                                                                                                                | 350  | 0    | 36 |
| Mehta, S      | 1977 | India      |                                                                | W, H, head circumference                                                 |                                                                                                                | 68   |      | 60 |
| Mo-suwan, L   | 2000 | Thailand   |                                                                | BMI                                                                      | parental income                                                                                                | 2252 |      | 60 |
| Nagra, S. A.  | 1989 | Pakistan   |                                                                | W                                                                        | feeding: breast/bottle                                                                                         | 916  | 0    | 12 |
| Pandey, A     | 1996 | India      |                                                                |                                                                          |                                                                                                                | 200  | <60  | 12 |
| Paul, B       | 2008 | India      |                                                                | W, H, chest circumference                                                |                                                                                                                | 126  | 0    |    |
| Raghupathy, P | 2010 | India      | adult DM/IGT/insulin secretion                                 | H,W,BMI at birth/childhood/adolescence                                   |                                                                                                                | 2218 |      |    |
| Rao, S        | 2000 | India      |                                                                | H, W                                                                     |                                                                                                                | 845  | 0-60 | 24 |
| Rao, S        | 2000 | India      |                                                                | foot length, leg length, shoulder width, sitting height, height velocity | compare to well-off Indian and to British                                                                      | 1020 |      | 24 |
| Raqib         | 2007 | Bangladesh | blood (thymopoiesis, T cell turnover (telomeres length and CD3 | H,W, head circumference at birth                                         | SES                                                                                                            | 179  | 0    | 60 |

|                          |      |            |                                                                                                       |                                                               |                                                                                                                                          |           |       |    |
|--------------------------|------|------------|-------------------------------------------------------------------------------------------------------|---------------------------------------------------------------|------------------------------------------------------------------------------------------------------------------------------------------|-----------|-------|----|
|                          |      |            | concentration),<br>percentage of<br>lymphocytes,<br>acute phase<br>response (plasma<br>interleukin 7) |                                                               |                                                                                                                                          |           |       |    |
| Ravikumara, M            | 1996 | India      |                                                                                                       | BW                                                            |                                                                                                                                          | 12283     |       | 36 |
| Rehman, AM               | 2009 | India      |                                                                                                       |                                                               |                                                                                                                                          | 452       | 0     |    |
| Rousham, E               | 1998 | Bangladesh | blood, urine                                                                                          |                                                               | SES, maternal age                                                                                                                        | 123       | 24-60 | 12 |
| Ruangkanchanas<br>etr, S | 2002 | Thailand   | blood lead                                                                                            | W,H                                                           | RF: living in Bangkok, maternal<br>labour workers, family income,<br>crowded family, household<br>occupation printing / lead<br>smelting | 511       | 15<   |    |
| Saha, KK                 | 2009 | Bangladesh |                                                                                                       | Anthropometric<br>indices (both WHO<br>and NCHS<br>reference) |                                                                                                                                          | 1343      | 0     | 24 |
| Saleemi, MA              | 2001 | Pakistan   |                                                                                                       | H compared to<br>NCHS and upper-<br>middle-class              | gender, area SES                                                                                                                         | 1236      | 0     | 60 |
| Saleemi, MA              | 2004 | Pakistan   |                                                                                                       | W, H                                                          | initiation of breastfeeding,<br>feeding of prelacteals, exclusive<br>breastfeeding                                                       | 1991      | 0     |    |
| Satyanarayana, K         | 1986 | India      |                                                                                                       | H, W                                                          | work history (child labourers vs.<br>students)                                                                                           | ~700      |       |    |
| Satyanarayana, L         | 1995 | India      |                                                                                                       |                                                               |                                                                                                                                          |           |       |    |
| Schwekendiek, D          | 2009 | Korea      |                                                                                                       | H                                                             |                                                                                                                                          |           |       |    |
| Shahidullah, M.          | 1994 | Bangladesh |                                                                                                       |                                                               |                                                                                                                                          | 2990      | 0     |    |
| Son, M                   | 2006 | Korea      |                                                                                                       |                                                               | parents' age, education and<br>occupation                                                                                                | 5,711,337 |       |    |
| Soudarssanane,<br>M.     | 1992 | India      |                                                                                                       |                                                               |                                                                                                                                          | 8185      | 0     |    |
| Thitasomakul, S          | 2006 | Thailand   |                                                                                                       |                                                               |                                                                                                                                          | 599       | 9     |    |
| Tikmani, S               | 2010 | Pakistan   | infant plasma<br>bilirubin if                                                                         |                                                               |                                                                                                                                          | 1690      | 0     |    |

|                 |      |          |                                            |                                                                                                                                                       |                                                                                                                                                                                |      |        |    |
|-----------------|------|----------|--------------------------------------------|-------------------------------------------------------------------------------------------------------------------------------------------------------|--------------------------------------------------------------------------------------------------------------------------------------------------------------------------------|------|--------|----|
|                 |      |          | jaundiced                                  |                                                                                                                                                       |                                                                                                                                                                                |      |        |    |
| Tripathy, R.    | 2000 | India    |                                            | Mean and SDs of W/A and L/A and mean Z scores for W/A, L/A and W/L calculated separately for boys and girls with reference to NCHS-WHO and BFDS data. |                                                                                                                                                                                | 114  | 0      | 12 |
| Tuntiseranee, P | 1999 | Thailand |                                            | BW                                                                                                                                                    | socioeconomic status, maternal education, maternal occupation, family income, work exposure characteristics (Karasek's job content questionnaires), antenatal care use, parity | 1797 | -2     |    |
| Veena, S        | 2010 | India    |                                            |                                                                                                                                                       | SES, breastfeeding and intro supplementary, maternal age, parents' attained schooling and rural/urban residence                                                                | 514  | 0      |    |
| Veena, S        | 2010 | India    | mother                                     |                                                                                                                                                       |                                                                                                                                                                                | 536  | -20-32 |    |
| Yajnik, C       | 1995 | India    | plasma glucose and insulin 30min after OGL | BW                                                                                                                                                    |                                                                                                                                                                                | 379  | 48     |    |
| Zaman, S        | 1993 | Pakistan |                                            | growth                                                                                                                                                | paternal literacy, home cleanliness                                                                                                                                            | 1476 | 0      | 24 |
| Zaman, S        | 1993 | Pakistan |                                            |                                                                                                                                                       | gender, area                                                                                                                                                                   | 1476 | 0      | 24 |
| Zumrawi, F      | 1988 | Sudan    |                                            | W, H                                                                                                                                                  | parity, maternal income, maternal education, home ownership, own kitchen, water supply, ventilation, sewage                                                                    | 439  | 0      |    |

BFDS – Breast Fed Pooled Data Set, BH – length at birth, BMI – bodt mass index, BP – blood pressure, BW – birth weight, H – height, IUGR – intra-uterine growth retardation, NCHS – national child health standards, PI – ponderal index, SD – standard deviation, W – weight

\*Where multiple papers have been found per study, study characteristics are drawn from all papers but the author and publication date of the



first paper chronologically has been tabulated.
